# Supplementary material for: Omics Analyses of Trichomonas vaginalis Actin and Tubulin and Their Participation in Intercellular Interactions and Cytokinesis
Source: MDPI journal article supplement (doi:10.3390/genes13061067), 2022-06-15
Supplement: s1 [file s1]

MAEEDVQTLVIDNGSGMCKAGFSGDEAPRSVFPSVVGRPKYKQQLVGGNAKDVFVGDEAC  
SKAGVLILKYPIEHGIVNNWDDMEKIWHHTFYNELRVDPTEHPVLLTEAPLNPKANREKM  
ISLMFDTFNVPSFYVGIQAVLSLYSSGRTTGIVFDAGDGVSHTVPIYEGYSLPHAIMRLN  
LAGRDLTAWMVKLLTERGNAFNTTAEKEIVRDIKEKLCYVALDFDAEMEKAATDSSINVN  
YTLPDGNVITIGNERFRCPEMLFKPYFDGMEYDGIDKTLFDSIMKCDIDVRKDLYANIVL  
SGGTTMFQGIAPERLDKEITALAPPTMKVKIVAPEERKYAVWVGGSILASLATFPQMVITK  
EEYDEAGPSIVHRKCF

**Supplementary Figure S7.** Localization of peptides identified by LC-ESI-MS of the spots 1-3 of actin protein (TvACT4, TVAG\_249200). The aa shaded in gray correspond to the common peptides identified in the three spots. The aa in the black boxes are the differential peptides identified only in spot 1; the underlined aa correspond to the differential peptides identified only in spot 2: The grey boxes correspond to the aa of the differential peptides identified only in spot 3.
