# Supplementary material for: Omics Analyses of Trichomonas vaginalis Actin and Tubulin and Their Participation in Intercellular Interactions and Cytokinesis
Source: MDPI journal article supplement (doi:10.3390/genes13061067), 2022-06-15
Supplement: s1 [file s1]

**Supplementary Table S4.** Multiple alignment of the 5'- and 3'-regulatory sequences of the bonafide tubulin-encoding genes of *T. vaginalis*.

| Group                 | Name    | TVAG                  |        |                                                                                                                          |        |                                                                                                 |
|-----------------------|---------|-----------------------|--------|--------------------------------------------------------------------------------------------------------------------------|--------|-------------------------------------------------------------------------------------------------|
| 5'-regulatory regions |         |                       | +1     |                                                                                                                          |        |                                                                                                 |
| I                     | A       | TvTUBa1               | 359090 | AAAATAGAGGATGTCTGTTTGATTTTCCAAATACGTTATTAATAAAAATCCGTTTCTTTTTCTAAAAAGTGC <u>ACT</u> CTTCATCAATG                          |        |                                                                                                 |
|                       |         | TvTUBa2               | 196270 | AAAATAGAGGATGTCTGTTTGATTTTCCAAATACGTTATTAATAAAAATCCGTTTCTTTTTCTAAAAAGTGC <u>ACT</u> CTTCATCAATG                          |        |                                                                                                 |
|                       |         | TvTUBa3               | 206890 | ATAGCCATACAAACAAAATATCAAAAGACAAGTAAAAATCCGTTATGTTTTCTTGAGAAAGCAGATTTTGAC <u>ACT</u> CTTCATCAATG                          |        |                                                                                                 |
|                       |         | TvTUBa4               | 312330 | ATTTTTTCATTGAAAAATTAATAACGTTAATTTTTGAATGCCGTTTTGTACGTTATCAAGA <u>GACGGTT</u> TGCTTC <u>ACT</u> CTTCATCAATG               |        |                                                                                                 |
|                       |         | TvTUBa5               | 360870 | CATTTATCCTTGACAATACTGTCTAAGCAAAATATCTAAAAATAGGAAAAAATTCGTTAGTAGTTTTTTAATTC <u>ACT</u> CTTCATCAATG                        |        |                                                                                                 |
|                       |         | TvTUBa6               | 448380 | TTGCAGCAAGATTAAAAACGGATGTGTCCGTTTTTAATAAAAAACTCTCAGAAAAATTTGTAGGGTTTGTC <u>AAATCACT</u> CTTCATCAATG                      |        |                                                                                                 |
|                       |         | TvTUBa7               | 467840 | TGAATTAGTAAACTGAAAACGGATTTGCCCGTTTTTTAAATAAAAAACACTCAGAAAAATTTGAAATGATTCTC <u>AAATCACT</u> CTTCATCAATG                   |        |                                                                                                 |
|                       | B       | TvTUBβ1               | 034440 | TAATACGCATATTCTTTTTTATATATTTAAATTGTGATGGAGTGGTGGTTTTTTCACGTTATTCATTTTCTATC <u>ACTTCA</u> TTCTCAATG                       |        |                                                                                                 |
|                       |         | TvTUBβ2               | 456920 | AATTACGGGACAGATAAATTATAAACTGATCTTGTGAATTATTTGAGTGAAACCGCTCAATACGTTAATATC <u>ATT</u> ATTCCACATG                           |        |                                                                                                 |
|                       |         | TvTUBβ3               | 008680 | CACATAAATCCAGAAATAGTAAACGTGCACCTTATCAAACTATTGAGTAAACCGCTAAATACGTTTTTAAATC <u>ACT</u> ACTTTTCATG                          |        |                                                                                                 |
|                       |         | TvTUBβ4               | 062880 | ATAAAAAGGCTCAAAAAATAAACGCCCGGGCTGAATAAATTGAAATAAACCGAATAATTCGTTTTTAAATC <u>ATA</u> ATTACACATG                            |        |                                                                                                 |
|                       |         | 3'-regulatory regions |        |                                                                                                                          |        |                                                                                                 |
|                       |         | I                     | A      | TvTUBa1                                                                                                                  | 359090 | .....TAAATTCGCTAATTCCTAAAACATTATTATTAATGTTTCGTAATTCGATATATTTTTTCTCATGTTCTTTGATTTATAGTCATAATCTTA |
|                       |         |                       |        | TvTUBa2                                                                                                                  | 196270 | TAAATTCGCTAATTCCTAAAACATTATTATTAATGCTCATAATTAGATATATTTTTTCTCATTTTTCTTAAATATTCCAGATCCAATTT       |
| TvTUBa3               | 206890  |                       |        | TAAATTCGCTAATTCCTAAAACATTATTATTAATGTTTCGTAATTTAGATATATTTTTTCTCATGTTCTTTGATTTCTAGTCATAATCTTAA                             |        |                                                                                                 |
| TvTUBa4               | 312330  |                       |        | TAAATTCGCTAATTCCTAAAACATTATTATTAATAATATATATATTTTTGATCTTTGGTTTCGATTCAATAATCTTAAATATTCCAGATC                               |        |                                                                                                 |
| TvTUBa5               | 360870  |                       |        | TAAATTCGCTAATTCCTAAAAGGTATTTTTATATCTTATGACAAACAGATTCTTTTTTTATCTCATAATTCAAAAAGAAATTTTGATA                                 |        |                                                                                                 |
| TvTUBa6               | 448380  |                       |        | TAA GAACAATAAAACATCTAACGTTTTCTCCTTTTAAAAAATTTTTAAATTTTTCATCAATAAATACTCAATTATACCTTATCATATTGACTAATCCTCCATC                 |        |                                                                                                 |
| TvTUBa7               | 467840  |                       |        | TAA GAAAAAAAAAATTTTTTTTAAAAATAATTCCTTTATTATAATTCTCTATTCAATCTTACTCCAGTCAACTCTTGCTAATGCAGCAGCGTTTCTTACTTCA                 |        |                                                                                                 |
| B                     | TvTUBβ1 |                       | 034440 | TAAACAATTTTATGTTGGTTCCTGATAACTTTTTGTAATTTTTTAAATAAAAAATTATTTCAAAATGTTTTAAATTTTCATTCT                                     |        |                                                                                                 |
|                       | TvTUBβ2 |                       | 456920 | TAA GTAATCTAAACGAAGTTTCACAACATACTTTTATTTTAAATTTTTATAAGTTACTTTTTTATCATCCTTTACGAGTACATCCTTGAACGGTAATTTTTTTATTATTCCGAAATTA  |        |                                                                                                 |
|                       | TvTUBβ3 |                       | 008680 | TAA GCGATTTTATATTCTGACTATAAAACATGATTTGAGTTTTGTCTTAAATCATTTCAAATTTTTACATTTTTTTCATTGTACAAATAGATTTGATAAAAAGTTTCAATTATTTTAGA |        |                                                                                                 |
|                       | TvTUBβ4 |                       | 062880 | TAA GCAGTTATTTGATTTGAACGCIAAAGAATTATTTTTGGTGTAATAATTTTCTCATCCATTTTTAAAACTTCATCTATAAAAAATTTGAAATTAGATATTTTGTC             |        |                                                                                                 |

The 5'- and 3'-regulatory regions of all tubulin-like encoding sequences were analyzed to find putative Inr, Inr-like, motif 1 (M1), motif 2 (M2), motif 3 (M3), motif 4 (M4), motif 5 (M5), polyadenylation signal (PS), cleavage site (CS), and downstream element (DSE), respectively. The manual search of these putative elements was based on reported sequences by different groups (49-53) that resulted in 11 sequences containing the necessary elements to be expressed, such as a start codon (ATG), stop codon (TAA/TAG), putative Inr/Inr-like/motifs at the 5'upstream regulatory region and putative PS, CS, and DSE elements at the 3'downstream regulatory region. **Inr**, black and underlined capital letters; **motif M2**, highlighted in purple, **motif M3**, highlighted in green; **motif M4**, highlighted in blue; **PS**, underlined capital letters; **CS**, highlighted in gray; **DSE**, black capital letters. See Suppl. Table S6 for more information.
