# Supplementary material for: Omics Analyses of Trichomonas vaginalis Actin and Tubulin and Their Participation in Intercellular Interactions and Cytokinesis
Source: MDPI journal article supplement (doi:10.3390/genes13061067), 2022-06-15
Supplement: s1 [file s1]

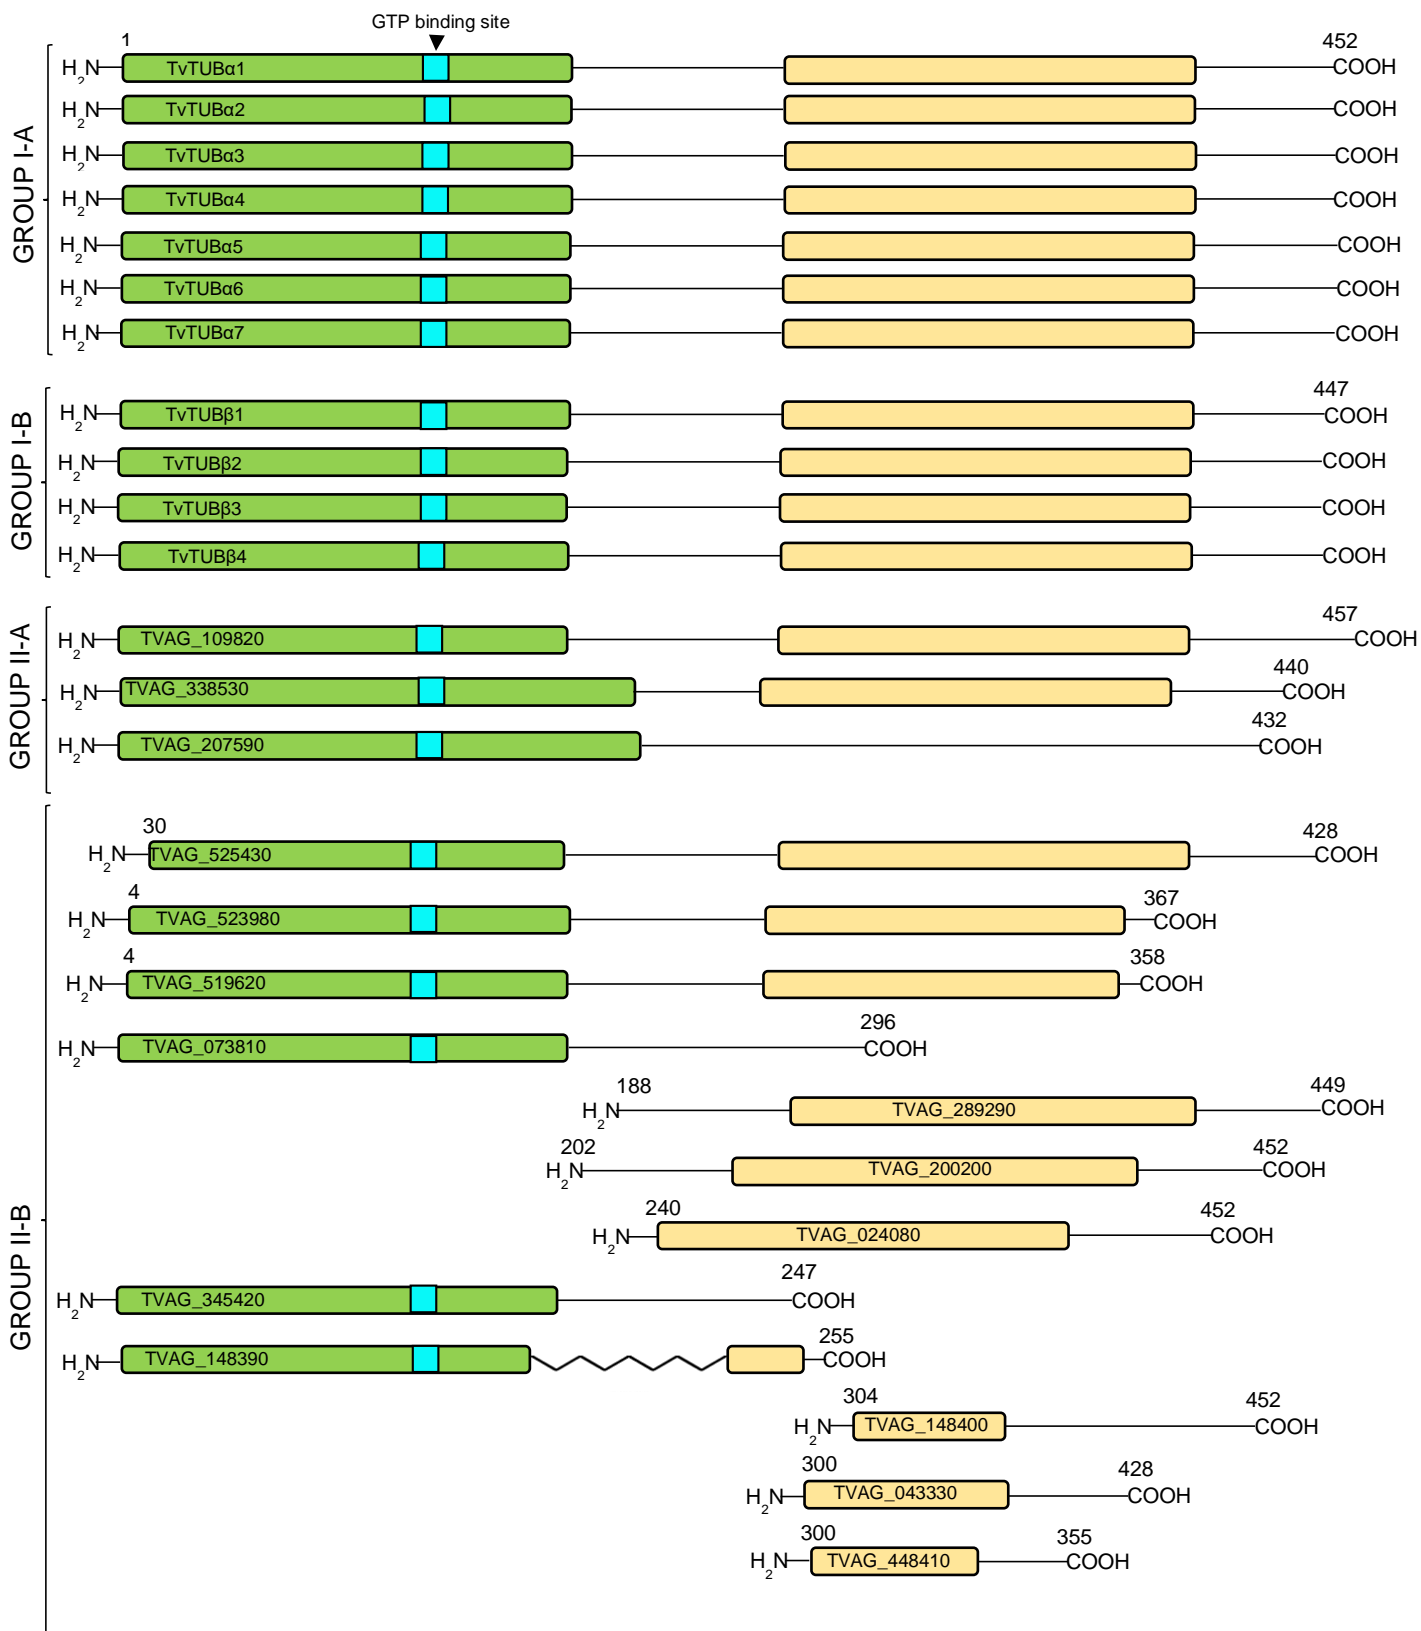

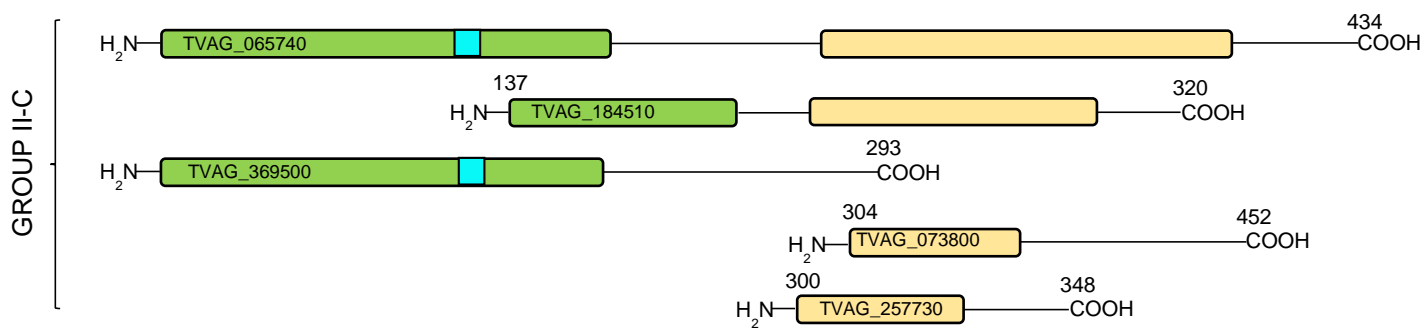

**Supplementary Figure S2.** *In silico* analysis of the 31 tubulin-like deduced aa sequences reported in the *T. vaginalis* genome database. The green box: tubulin GTPase domain. The turquoise box: GTP-binding site. The cream box: C-terminal tubulin domain. Groups are based on Supplementary Table S1 description.
