# Supplementary material for: Omics Analyses of Trichomonas vaginalis Actin and Tubulin and Their Participation in Intercellular Interactions and Cytokinesis
Source: MDPI journal article supplement (doi:10.3390/genes13061067), 2022-06-15
Supplement: s1 [file s1]

**Supplementary Table S9.** Predicted 3D structures of actin-like aa deduced sequences found in the *T. vaginalis* genome database.

| Protein |        |        | Template | Sequence Identity (%) | Description                                                                               | GMQE | Ramachandran Favoured (%) | 3D Model                                                                              |
|---------|--------|--------|----------|-----------------------|-------------------------------------------------------------------------------------------|------|---------------------------|---------------------------------------------------------------------------------------|
| Group   | Name   | TVAG_  |          |                       |                                                                                           |      |                           |                                                                                       |
| I       | TvACT1 | 160060 | 3ci5.1.A | 75.94                 | Major actin complex of phosphorylated <i>Dictyostelium discoideum</i> actin with gelsolin | 0.85 | 97.84                     | 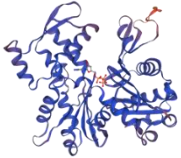   |
|         | TvACT2 | 172680 | 3ci5.1.A | 75.94                 | Major actin complex of phosphorylated <i>Dictyostelium discoideum</i> actin with gelsolin | 0.86 | 97.84                     |    |
|         | TvACT3 | 200190 | 3ci5.1.A | 75.94                 | Major actin complex of phosphorylated <i>Dictyostelium discoideum</i> actin with gelsolin | 0.84 | 97.84                     |    |
|         | TvACT4 | 249200 | 3ci5.1.A | 75.94                 | Major actin complex of phosphorylated <i>Dictyostelium discoideum</i> actin with gelsolin | 0.85 | 97.84                     |   |
|         | TvACT5 | 310030 | 3ci5.1.A | 75.94                 | Major actin complex of phosphorylated <i>Dictyostelium discoideum</i> actin with gelsolin | 0.85 | 97.84                     |  |
|         | TvACT6 | 485210 | 3ci5.1.A | 75.94                 | Major actin complex of phosphorylated <i>Dictyostelium discoideum</i> actin with gelsolin | 0.85 | 97.84                     |  |
|         | TvACT7 | 149090 | 3ci5.1.A | 75.94                 | Major actin complex of phosphorylated <i>Dictyostelium discoideum</i> actin with gelsolin | 0.85 | 97.84                     |  |

|  |   |         |        |          |       |                                                                                                                    |      |       |                                                                                       |
|--|---|---------|--------|----------|-------|--------------------------------------------------------------------------------------------------------------------|------|-------|---------------------------------------------------------------------------------------|
|  |   | TvACT8  | 54030  | 3ci5.1.A | 75.67 | Major actin complex of phosphorylated <i>Dictyostelium discoideum</i> actin with gelsolin                          | 0.85 | 97.84 | 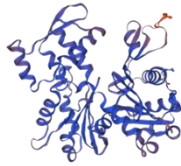   |
|  |   | TvACT9  | 90470  | 3ci5.1.A | 75.94 | Major actin complex of phosphorylated <i>Dictyostelium discoideum</i> actin with gelsolin                          | 0.85 | 97.84 |    |
|  |   | TvACT10 | 337240 | 3ci5.1.A | 75.94 | major actin complex of phosphorylated <i>dictyostelium discoideum</i> actin with gelsolin                          | 0.85 | 97.84 |    |
|  | A |         | 512800 | 2asm.1.A | 75.14 | Actin, alpha skeletal muscle structure of rabbit actin in complex with <i>Reidispongioliide A</i>                  | 0.86 | 98.35 |    |
|  |   |         | 150270 | 3ci5.1.A | 75.36 | Major actin complex of phosphorylated <i>Dictyostelium discoideum</i> actin with gelsolin                          | 0.85 | 97.95 |   |
|  |   |         | 534990 | 4b1w.1.A | 76.05 | Actin, alpha skeletal muscle structure of the Phactr1 RPEL-2 domain bound to actin                                 | 0.87 | 97.45 |  |
|  |   |         | 371880 | 4jd2.1.A | 52.93 | Actin-related protein 3 crystal structure of <i>Bos taurus</i> Arp2/3 complex binding with <i>Mus musculus</i> GMF | 0.80 | 94.90 |  |
|  |   |         | 043970 | 5i9e.1.A | 23.04 | Actin-related protein 4 crystal structure of a nuclear actin ternary complex                                       | 0.59 | 90.05 |  |

|    |   |        |          |       |                                                                                                                                                        |      |       |                                                                                       |
|----|---|--------|----------|-------|--------------------------------------------------------------------------------------------------------------------------------------------------------|------|-------|---------------------------------------------------------------------------------------|
| II | B | 094140 | 4efh.1.A | 43.16 | Actin-1<br><i>Acanthamoeba</i> actin<br>complex with Spir<br>domain D                                                                                  | 0.74 | 97.01 | 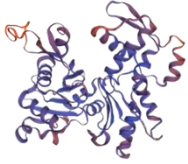   |
|    |   | 189860 | 7q8b.1.A | 25.22 | Actin<br><i>Leishmania major</i> actin<br>filament in ADP-Pi<br>state                                                                                  | 0.62 | 92.11 |    |
|    |   | 027630 | 2asm.1.A | 46.70 | Actin, alpha skeletal<br>muscle<br>structure of rabbit<br>actin in complex with<br><i>Reidispongiolide A</i>                                           | 0.80 | 97.21 |    |
|    |   | 161530 | 2asm.1.A | 38.55 | Actin, alpha skeletal<br>muscle<br>structure of rabbit<br>actin in complex with<br><i>Reidispongiolide A</i>                                           | 0.75 | 95.74 |    |
|    |   | 434970 | 1nmd.1.A | 26.85 | Actin<br>crystal structure of <i>D.</i><br><i>discoideum</i> actin-<br>gelsolin segment 1<br>complex crystallized in<br>the presence of<br>Lithium ATP | 0.71 | 95.00 |   |
|    |   | 248040 | 1yvn.1.A | 39.37 | Protein (actin)<br>the yeast actin Val 159<br>Asn mutant complex<br>with human gelsolin<br>segment 1.                                                  | 0.44 | 94.60 |  |
|    |   | 071770 | 5i9e.1.A | 21.99 | Actin-related protein 4<br>crystal structure of a<br>nuclear actin ternary<br>complex                                                                  | 0.60 | 91.83 |  |
|    |   | 495500 | 5i9e.1.A | 19.26 | Actin-related protein 4<br>crystal structure of a<br>nuclear actin ternary<br>complex                                                                  | 0.59 | 91.71 |  |

|   |        |          |       |                                                                                                                          |      |       |                                                                                       |
|---|--------|----------|-------|--------------------------------------------------------------------------------------------------------------------------|------|-------|---------------------------------------------------------------------------------------|
| C | 247170 | 3ci5.1.A | 49.87 | Major actin complex of phosphorylated <i>Dictyostelium discoideum</i> actin with gelsolin                                | 0.79 | 97.83 | 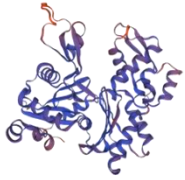   |
|   | 167330 | 4cbw.1.A | 33.61 | Actin, alpha skeletal muscle, actin crystal structure of <i>Plasmodium berghei</i> actin I with D-loop from muscle actin | 0.72 | 92.58 |    |
|   | 276270 | 3ci5.1.A | 43.63 | Major actin complex of phosphorylated <i>Dictyostelium discoideum</i> actin with gelsolin                                | 0.78 | 95.90 |    |
|   | 225210 | 3ci5.1.A | 34.73 | Major actin complex of phosphorylated <i>Dictyostelium discoideum</i> actin with gelsolin                                | 0.76 | 95.49 |    |
|   | 354260 | 3ci5.1.A | 23.69 | Major actin complex of phosphorylated <i>Dictyostelium discoideum</i> actin with gelsolin                                | 0.64 | 94.46 |   |
|   | 238100 | 4cbu.1.A | 58.77 | Actin-1 crystal structure of <i>Plasmodium falciparum</i> actin I                                                        | 0.71 | 96.33 |  |

3D Structure prediction for each deduced actin-like protein fragments of the *Tv* genome database was obtained in the Swiss Model Server from EXPASY (<https://swissmodel.expasy.org/>) [Waterhouse, A., Bertoni, M., Bienert, S., Studer, G., Tauriello, G., Gumienny, R., Heer, F.T., de Beer, T.A.P., Rempfer, C., Bordoli, L., Lepore, R., and Schwede, T. 2018. SWISS-MODEL: homology modelling of protein structures and complexes. *Nucleic Acids Res.* 46, W296-W303; Xu J, and Zhang Y. 2010. How significant is a protein structure similarity with TM-score = 0.5? *Bioinformatics.* 26(7):889-95] using the deduced aa sequence. These data were one of the parameters to consider for the identification of possible bonafide actin proteins (Group I) and actin-like protein segments (Group II) in *Tv*. **GMQE**, Global Model Quality Estimate. It is a quality estimate, which combines properties from the target-template alignment and the template 3D structure. GMQE gives an overall 3D model quality measurement between 0 and 1, the higher numbers indicating higher expected quality (Waterhouse *et al.*, 2018).
