# Supplementary material for: Omics Analyses of Trichomonas vaginalis Actin and Tubulin and Their Participation in Intercellular Interactions and Cytokinesis
Source: MDPI journal article supplement (doi:10.3390/genes13061067), 2022-06-15
Supplement: s1 [file s1]

IDPTGSYHGDSDLQLERINVYYNEATGGKYVPRAILVDLEPGTMDSVRAGQFGQLFRPDN  
FVFGQSGAGNNWAKGYYTEGQELCESILDVIRKEAESCDCLQGFQLVHSLGGGTGAGLGT  
LLLNKLREEYPDRILSTYSIVPSPKVSDTVVEPYNCTLSVHQLVESADEVFCIDNEALYD  
ICFRTLKLTTPTYGDLNHLVSMVMSGTTCALRFPGQLNSDLRKLAVNLPFFPRLHFFIVG  
FAPLTSRGSQQYRALTVPELTSQLFDNKNMMAACDPRRGVYLTASAHFRGRMSSKEVDEQ  
MLNIQARNTSYFVEWIPSNVKS AICDIPPRGLKMAATFIGNTTAFRELFTRVDSQFQKMY  
ARRAFIHWYVNEGLETVFDEARSNM TDLIRVRNVRNS

**Supplementary Figure S10.** Localization of peptides identified by LC-ESI-MS of the spot 2 and 4 of tubulin protein (TVAG\_525430). The black box indicates the peptides identified in both spots.
