# Supplementary material for: Omics Analyses of Trichomonas vaginalis Actin and Tubulin and Their Participation in Intercellular Interactions and Cytokinesis
Source: MDPI journal article supplement (doi:10.3390/genes13061067), 2022-06-15
Supplement: s1 [file s1]

**Supplementary Table S3.** Multiple alignment of the 5'- and 3- regulatory sequences of the bonafide actin-encoding genes of *T. vaginalis*.

| Group                        | Name    | TVAG_  |                                                                                                                                          |
|------------------------------|---------|--------|------------------------------------------------------------------------------------------------------------------------------------------|
| <b>5'-regulatory regions</b> |         |        |                                                                                                                                          |
| I                            | TvACT1  | 160060 | CTATCGTTCTGAAAACCCACATATTTTCTAGCAAGTTGCCCG <b>AAAAAAT</b> CAGAGTTGTGATACAGAAATAATT <b>TCAC</b> <sup>+1</sup> <b>TTTCTCTTAATG</b>         |
|                              | TvACT2  | 172680 | CTTAGATGTCCTGGTTATAAATTTTGAAGACTCT <b>AACCGTTG</b> TCTAAAGAAGTGAAATGATTGGAATGTTAACT <b>TCATT</b> <b>TTCTGGAATG</b>                       |
|                              | TvACT3  | 200190 | TTGACACAAAAAACCCACAATGACATGTGAATGATGCCCTTAAATTTGAGAGCGGATT <b>GAAAAATG</b> CTATGACT <b>TCACA</b> <b>TTCTCTTAATG</b>                      |
|                              | TvACT4  | 249200 | TCGTTCTGAAAACCCACATGAAAGCAAAGGTATGCCCTATCAAATCAGCATAAAACCG <b>TCATTTT</b> TGATCAGT <b>TCACA</b> <b>TTCTCTTAATG</b>                       |
|                              | TvACT5  | 310030 | CCACTAATCCGATA <b>AAAGTGAC</b> AGAAGAGTTCATCTTGCCCG <b>AAAAAAT</b> TCAGGGACATTATCAAAATTATAAT <b>TCAC</b> <b>TTTCTCTTAATG</b>             |
|                              | TvACT6  | 485210 | ACTAAATGGGACAAAAGACAGAAGGTTTCCCAAATTGAATGGAAGTGACGTGAGAATATTGCCCATTTCAAAG <b>TCAC</b> <b>TTTCTCTTAATG</b>                                |
|                              | TvACT7  | 149090 | CTTCACTTGTTTCA <b>AACCGTTT</b> TTTATATGAATTAATTTGAGAACTTTACAGGTCATAAGAAACACTTTTTCTT <b>TCAC</b> <b>TTTCTCTTAATG</b>                      |
|                              | TvACT8  | 054030 | GACGAAATAAACCA <b>AAAGTGAC</b> GATCCACTTCATATTGCCCGAAATAATTGAGAGGTTTTGGCAAAAAGAATG <b>TCAC</b> <b>TTTCTCTTAATG</b>                       |
|                              | TvACT9  | 090470 | TGAGATTCTATCGTTTGAAAACCCACAAGTCCACTTCACGTTTGCCCTATTTCTGAGGGAAGTGAATGACT <b>TCACA</b> <b>TTTCTCTTAATG</b>                                 |
|                              | TvACT10 | 337240 | CCATATTTGAATTCCTCTCAAAATATAAAATCCCTTTCAAAAAGAGATTGAAAGAAGGGCAAATT <b>AAAGTGAC</b> <b>TCATT</b> <b>TTCTCTTAATG</b>                        |
| <b>3'-regulatory regions</b> |         |        |                                                                                                                                          |
| I                            | TvACT1  | 160060 | <b>TAA</b> ACAATTTCCGGTATAATATATTTAAATCAAATCAATTTT <b>TTTTATTTT</b> CTATCCTAATTTATAACTAATTCATAATACTTTATGGCAATAAAGTTAATA                  |
|                              | TvACT2  | 172680 | <b>TAA</b> ACAATTTCCGGTATAATATATTT <b>CAAAATTAATTAAC</b> TTTTTCTTTAGTGAACCTGTTTGGAAATCACTTCATTAATATTGTGTTTTAATGGTTTATA                   |
|                              | TvACT3  | 200190 | <b>TAA</b> AAAGTTTTTTTTTCGTTGTCTCCAATT <b>TAATCAAAAAATATTTTTT</b> CATTATTTACTTGATATAGCTATCTTTAAGCTGAACATTCAATATAATACATAT                 |
|                              | TvACT4  | 249200 | <b>TAA</b> ATTTTCCGGTTTATTTGATAATT <b>TTCTCTCTTTTTAATAATTTCTCATCTT</b> ATTATATGATAACTATTGCATGATCTTTTGTACTACTACAAATG                      |
|                              | TvACT5  | 310030 | <b>TAA</b> CAACTTCGGTATATATTTTATAATT <b>TATCAACTTTTTTCCTTTTTT</b> TATGAAAATTTATCTCAGATTGTTTCCAAAGTGAAGATAATTTAAGGATAA                    |
|                              | TvACT6  | 485210 | <b>TAA</b> ATTTTCCGGTCTTTATATTACTACAAATTT <b>ACTTACTTTTTTACTTTTT</b> TACCAAGCATTCTAGAAATAATTCATTTACTTTATTGGAAATCTATAAGTT                 |
|                              | TvACT7  | 149090 | <b>TAA</b> ACAATTTCCGAATA <b>TAAT</b> ATTTATTGAATTCGAAAAAAAT <b>TTCTTTTAATTT</b> CAAAAAGATTTATGTTTATTAGCAAATGAAG <b>TTTAATTTCTTATATC</b> |
|                              | TvACT8  | 054030 | <b>TAA</b> AAAGTTTTTTTTTCGTTGTCTCCAATTATTCAAATC <b>TTTTTTTT</b> TATTACTGTTTCAATTCATTAGAAAGTGAAGT <b>TTTTTAAAGCACTATCTGGCC</b>            |
|                              | TvACT9  | 090470 | <b>TAA</b> ACTATATTTTATTAGCTTCCAGTTAA <b>CAAAATTTATCAGTTTTTT</b> AAATATTTTCAATATTTGAAATTAATCATTCTCAACTGGCCAATTACTA                       |
|                              | TvACT10 | 337240 | <b>TAA</b> ACAATTTGAAATGTTTCAGATTCCAAATTTCTAAT <b>TTTTTTAACTTTTTT</b> ACTCTTTTACAACATCTTTATCAATCTACGCCTTATATAATTCCT                      |

The 5'- and 3'-regulatory regions of all actin-like encoding sequence were analyzed to find putative Inr, Inr-like, motif 1 (M1), motif 2 (M2), motif 3 (M3), motif 4 (M4), motif 5 (M5), polyadenylation signal (PS), cleavage site (CS) and downstream element (DSE), respectively. The manual search of these putative elements was based on reported sequences by different groups (49-53) that resulted in 10 sequences containing the necessary elements to be expressed, such as a start codon (ATG, red letter), stop codon (TAA, red letter), putative Inr/Inr-like/motifs at the 5'upstream regulatory region and putative PS, CS and DSE elements at the 3'downstream regulatory region. **Inr**, black and underlined capital letters; **motif M1**, highlighted in yellow; **motif M2**, highlighted in purple, **motif M3**, highlighted in green; **M4**, highlighted in blue; **PS**, underlined capital letters; **CS**, highlighted in gray; **DSE**, bold capital letters. See Suppl. Table S5 for more information.
