# Supplementary material for: Omics Analyses of Trichomonas vaginalis Actin and Tubulin and Their Participation in Intercellular Interactions and Cytokinesis
Source: MDPI journal article supplement (doi:10.3390/genes13061067), 2022-06-15
Supplement: s1 [file s1]

|         |                                                              |     |
|---------|--------------------------------------------------------------|-----|
| CNCD147 | MREVISIHVGQAGVQIGNGCWELYCLEHGIQPDGQLPSDKTIGVEDDAFNTFFSETGAGK | 60  |
| G3      | MREVISIHVGQAGVQIGNGCWELYCLEHGIQPDGQLPSDKTIGVEDDAFNTFFSETGAGK | 60  |
|         | *****                                                        |     |
| CNCD147 | HVPRAVFVDLEPTVVDEVRTGTYRQLFHPEQLISGKEDAANNYARGHYTVGKEIIDLTLD | 120 |
| G3      | HVPRAVFVDLEPTVVDEVRTGTYRQLFHPEQLISGKEDAANNYARGHYTVGKEIIDLTLD | 120 |
|         | *****                                                        |     |
| CNCD147 | RIRKLADQCTGLQGFLIFHSFGGGTGAGFGSLLERLSVDYGKSKLEFTVYPSPQVSTA   | 180 |
| G3      | RIRKLADQCTGLQGFLIFHSFGGGTGAGFGSLLERLSVDYGKSKLEFTVYPSPQVSTA   | 180 |
|         | *****                                                        |     |
| CNCD147 | IVEPYNILATHSMIDHSDCAFMVDNEALYDLCRRALDIERPTYTNLNRILIGQVSSSLTA | 240 |
| G3      | IVEPYNILATHSMIDHSDCAFMVDNEALYDLCRRALDIERPTYTNLNRILIGQVSSSLTA | 240 |
|         | *****                                                        |     |
| CNCD147 | SLRFDGALNVDFTFQTNLVPYARIHFPICSYAPVISAEKAYHEQLSVAEITNSLFEPAN  | 300 |
| G3      | SLRFDGALNVDFTFQTNLVPYARIHFPICSYAPVISAEKAYHEQLSVAEITNSLFEPAN  | 300 |
|         | *****                                                        |     |
| CNCD147 | MMVKCDPRHGKYMACTLLYRGDVVPKDVSAAVATIKTKRTIQFVDWCPTGFKMGINYQPP | 360 |
| G3      | MMVKCDPRHGKYMACTLLYRGDVVPKDVSAAVATIKTKRTIQFVDWCPTGFKMGINYQPP | 360 |
|         | *****                                                        |     |
| CNCD147 | TVVPGGDLAKVQRAVCMLANTTAIAEAWSRLDHKFDLMYAKRAFVHWYVGEEMEEAEFPE | 420 |
| G3      | TVVPGGDLAKVQRAVCMLANTTAIAEAWSRLDHKFDLMYAKRAFVHWYVGEEMEEAEFPE | 420 |
|         | *****                                                        |     |
| CNCD147 | AREDLALLEKDYDEVAAESVEGGDEEEDGGEM                             | 452 |
| G3      | AREDLALLEKDYDEVAAESVEGGDEEEDGGEM                             | 452 |
|         | *****                                                        |     |

**Supplementary Figure S6.** Amino acid alignment of the TvTUB $\alpha$ 1 protein of the *T. vaginalis* CNCD147 isolate and the G3 *T. vaginalis* genome. \* Represents identical amino acid.
