# Supplementary material for: Omics Analyses of Trichomonas vaginalis Actin and Tubulin and Their Participation in Intercellular Interactions and Cytokinesis
Source: MDPI journal article supplement (doi:10.3390/genes13061067), 2022-06-15
Supplement: s1 [file s1]

**Supplementary Table S10.** Predicted 3D structures of the tubulin-like deduced aa sequences found in the *T. vaginalis* genome database.

| Protein |      |         | Template | Sequence Identity (%) | Description | GMQE          | Ramachandran Favoured (%) | 3D Model |                                                                                       |
|---------|------|---------|----------|-----------------------|-------------|---------------|---------------------------|----------|---------------------------------------------------------------------------------------|
| Group   | Name | TVAG_   |          |                       |             |               |                           |          |                                                                                       |
| I       | A    | TvTUBα1 | 359090   | 6u42.62               | 84.82       | Tubulin alpha | 0.84                      | 97.00    | 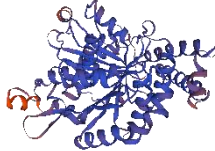   |
|         |      | TvTUBα2 | 196270   | 6u42.62               | 84.82       | Tubulin alpha | 0.84                      | 97.00    |    |
|         |      | TvTUBα3 | 206890   | 6u42.62               | 84.82       | Tubulin alpha | 0.84                      | 97.00    |    |
|         |      | TvTUBα4 | 312330   | 6u42.62               | 84.82       | Tubulin alpha | 0.84                      | 97.00    |    |
|         |      | TvTUBα5 | 360890   | 6u42.62               | 84.82       | Tubulin alpha | 0.84                      | 97.00    |   |
|         |      | TvTUBα6 | 448390   | 6u42.62               | 84.41       | Tubulin alpha | 0.85                      | 97.00    |  |
|         |      | TvTUBα7 | 467840   | 6u42.62               | 84.41       | Tubulin alpha | 0.85                      | 97.00    |  |
|         | B    | TvTUBβ1 | 034440   | 6u42.5                | 77.83       | Tubulin beta  | 0.84                      | 96.98    |  |
|         |      | TvTUBβ2 | 456920   | 6u42.5                | 78.11       | Tubulin beta  | 0.84                      | 97.22    |  |
|         |      | TvTUBβ3 | 008680   | 6u42.5                | 78.11       | Tubulin beta  | 0.84                      | 97.22    |  |

|    |   |         |        |         |       |                       |      |       |                                                                                       |
|----|---|---------|--------|---------|-------|-----------------------|------|-------|---------------------------------------------------------------------------------------|
|    |   | TvTUBβ4 | 062880 | 6u42.5  | 78.11 | Tubulin beta          | 0.84 | 97.22 |     |
| II | A |         | 109820 | 7qj0.1  | 53.08 | Tubulin gamma-1 chain | 0.73 | 90.00 |    |
|    |   |         | 338530 | 3jaw.1  | 70.34 | Tubulin beta chain    | 0.84 | 96.96 |    |
|    |   |         | 207590 | 5mjs.1  | 25.79 | Tubulin beta chain    | 0.54 | 92.29 |    |
|    | B |         | 525430 | 7rro.28 | 79.29 | Tubulin beta-4B chain | 0.85 | 97.72 |   |
|    |   |         | 523980 | 6u42.32 | 84.66 | Tubulin alpha         | 0.84 | 96.35 |  |
|    |   |         | 519620 | 6u42.62 | 85.75 | Tubulin alpha         | 0.86 | 96.07 |  |
|    |   |         | 073810 | 6u42.15 | 79.35 | Tubulin beta          | 0.81 | 96.76 |  |
|    |   |         | 289290 | 3jaw.1  | 64.40 | Tubulin beta chain    | 0.81 | 98.76 |  |

|  |          |  |        |          |       |                       |      |       |                                                                                       |
|--|----------|--|--------|----------|-------|-----------------------|------|-------|---------------------------------------------------------------------------------------|
|  |          |  | 200200 | 7rro.26  | 61.34 | Tubulin beta-4B chain | 0.76 | 94.09 | 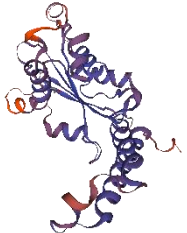   |
|  |          |  | 024080 | 7miz.51  | 70.53 | Tubulin alpha chain   | 0.73 | 92.78 |    |
|  |          |  | 345420 | 6u42.12  | 84.36 | Tubulin alpha         | 0.85 | 94.23 |    |
|  |          |  | 148390 | 7rro.24  | 86.80 | Tubulin beta-4B chain | 0.86 | 96.41 |    |
|  |          |  | 148400 | 7rro.26  | 65.73 | Tubulin beta-4B chain | 0.77 | 95.56 |    |
|  |          |  | 043330 | 7n32.1   | 75.00 | Tubulin alpha chain   | 0.71 | 95.24 |   |
|  |          |  | 448410 | 5sye.3   | 90.57 | Tubulin alpha-chain   | 0.61 | 94.12 |  |
|  | <b>C</b> |  | 065740 | 7n6g.105 | 29.90 | Tubulin beta          | 0.67 | 92.89 |  |
|  |          |  | 184510 | 7rro.22  | 44.04 | Tubulin beta-4B chain | 0.74 | 94.28 |  |

|  |  |  |        |         |       |                       |      |       |                                                                                     |
|--|--|--|--------|---------|-------|-----------------------|------|-------|-------------------------------------------------------------------------------------|
|  |  |  | 369500 | 7as4.1  | 53.28 | Tubulin gamma-1 chain | 0.72 | 91.10 | 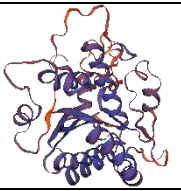  |
|  |  |  | 73800  | 7rro.26 | 65.73 | Tubulin beta-4B chain | 0.77 | 95.56 |  |
|  |  |  | 257730 | 7n32.1  | 78.72 | Tubulin alpha chain   | 0.64 | 95.56 |  |

3D Structure prediction for each tubulin-like protein fragment found in the *Tv* genome database was obtained in the Swiss Model Server from EXPASY (<https://swissmodel.expasy.org/>) [Waterhouse, A., Bertoni, M., Bienert, S., Studer, G., Tauriello, G., Gumienny, R., Heer, F.T., de Beer, T.A.P., Rempfer, C., Bordoli, L., Lepore, R. and Schwede, T. 2018. SWISS-MODEL: homology modelling of protein structures and complexes. *Nucleic Acids Res.* 46, W296-W303; Xu J, and Zhang Y. 2010. How significant is a protein structure similarity with TM-score = 0.5? *Bioinformatics.* 26(7):889-95] using the deduced aa sequence. These data were one of the parameters to consider for the identification of possible alpha (Group I-A) and beta tubulins (Group I-B) in *Tv*. **GMQE**, Global Model Quality Estimate. It is a quality estimate, which combines properties from the target-template alignment and the template structure. GMQE gives an overall model quality measurement between 0 and 1, with higher numbers indicating higher expected quality (Waterhouse A. *et al.*, 2018).
