# Supplementary material for: Omics Analyses of Trichomonas vaginalis Actin and Tubulin and Their Participation in Intercellular Interactions and Cytokinesis
Source: MDPI journal article supplement (doi:10.3390/genes13061067), 2022-06-15
Supplement: s1 [file s1]

MVREIVHIQAGQCGNQIGAKFWEVISDEHGIDPTGSYHGDSDLQLERINVYYNEATGGKY  
VPRAILVDLEPGTMDSVRAGQFGQLFRPDNFVFGQSGAGNNWAKGYYTEGQELCESILDV  
IRKEAESCDCLQGFQLVHSLGGGTGAGLGTLNKLREEYPDRILSTYSIVPSPKVSDTV  
VEPYNCTLSVHQLVESADEVFCIDNEALYDICFRTLKLTPTYGDLNHLVSMMSGTTCA  
LRFPGQLNSDLRLAVNLVPFPRLHFFIVGFAPLTSRGSQQYRALTVPELTSQLFDNKNM  
MAACDPRRGVYLTASAHFRGRMSSKEVDEQMLNIQARNTSYFVEWIPSNVKSAICDIPPR  
GLKMAATFIGNTTAFRELFTRVDSQFQKMYARRAFIHWYVNEGLETVFDEARSNMTDLI  
QEYEMYETAGVEEQGEGEEDEEGEAAA

**Supplementary Figure S8.** Localization of peptides identified by LC-ESI-MS of the spots 1 and 3 of tubulin protein (TvTUB $\beta$ 2; TVAG\_456920). The black box indicates the common peptides identified in the two spots. Shaded in grey indicates the differential peptides identified only in spot 3.
