# Supplementary material for: Omics Analyses of Trichomonas vaginalis Actin and Tubulin and Their Participation in Intercellular Interactions and Cytokinesis
Source: MDPI journal article supplement (doi:10.3390/genes13061067), 2022-06-15
Supplement: s1 [file s1]

**Supplementary Table S8.** Protein expression of tubulin-like encoding gene fragments in proteomes reported of different *T. vaginalis* isolates and under distinct culture conditions.

| Isolate              |      |         | T1 <sup>19, 21</sup> |     | FMV1 <sup>15</sup> |     | 1 <sup>28</sup> |     | PA <sup>18</sup> | SD7 <sup>18</sup> | B7268 <sup>18</sup> | G3 <sup>18</sup> | SD10 <sup>18</sup> | T1 <sup>18</sup> | LSU 160 <sup>29</sup> | Unknown <sup>20</sup> | B7RC2 <sup>24,26</sup> |     | RU393 <sup>25</sup> | TV17-48 <sup>30</sup> | FMV1 <sup>22</sup>   |    |     |
|----------------------|------|---------|----------------------|-----|--------------------|-----|-----------------|-----|------------------|-------------------|---------------------|------------------|--------------------|------------------|-----------------------|-----------------------|------------------------|-----|---------------------|-----------------------|----------------------|----|-----|
| Condition/Morphology |      |         | IR                   | HI  | TF                 | CLS | TF              | CLS | HI               |                   |                     |                  |                    |                  | Am                    |                       | Ca <sup>2+</sup>       | Suc | HI/Am               | Unknown               | Infection time (min) |    |     |
| Extract/Organelle    |      |         | Hyd                  | Hyd | TE                 | TE  | TE              | TE  | MEP              |                   |                     |                  |                    |                  | TE                    |                       | MVs                    | Exo | MEP                 | Lys                   | 5                    | 30 | 120 |
| Group                | Name | TVAG_   |                      |     |                    |     |                 |     |                  |                   |                     |                  |                    |                  |                       |                       |                        |     |                     |                       |                      |    |     |
| I                    | A    | TvTUBα1 | 359090               |     |                    | x   | xx              |     |                  |                   |                     |                  |                    |                  |                       |                       | x                      |     |                     |                       | x                    |    |     |
|                      |      | TvTUBα2 | 196270               |     |                    | x   | xx              | x   | x                | x                 | x                   | x                | x                  | x                |                       | ±                     | x                      |     | x                   |                       | x                    | x  | x   |
|                      |      | TvTUBα3 | 206890               |     |                    | x   | xx              |     |                  |                   |                     |                  |                    |                  |                       |                       | x                      |     |                     |                       | x                    | x  | x   |
|                      |      | TvTUBα4 | 312330               |     |                    | x   | xx              |     |                  |                   |                     |                  |                    |                  |                       |                       | x                      |     |                     |                       |                      |    |     |
|                      |      | TvTUBα5 | 360870               | ±   |                    | x   | xx              |     |                  |                   |                     |                  |                    |                  |                       |                       | x                      |     |                     |                       |                      |    |     |
|                      |      | TvTUBα6 | 448390               | ±   |                    |     |                 |     |                  |                   |                     |                  | x                  | x                |                       |                       |                        |     | x                   |                       |                      |    |     |
|                      |      | TvTUBα7 | 467840               |     |                    |     |                 |     |                  |                   |                     |                  |                    |                  |                       |                       |                        |     |                     |                       |                      |    |     |
|                      | B    | TvTUBβ1 | 34440                | xx  |                    | x   |                 | x   |                  |                   |                     |                  |                    |                  | x                     |                       | x                      |     |                     |                       |                      |    |     |
|                      |      | TvTUBβ2 | 456920               | ±   |                    | x   | xx              |     |                  |                   |                     |                  |                    |                  |                       |                       | x                      | x   |                     |                       | x                    |    |     |
|                      |      | TvTUBβ3 | 008680               |     | x                  | x   | xx              |     |                  | x                 | x                   | x                |                    | x                |                       |                       | x                      | x   | x                   |                       | x                    |    | x   |
|                      |      | TvTUBβ4 | 062880               |     |                    | x   | xx              |     |                  |                   |                     |                  |                    |                  |                       |                       | x                      | x   |                     |                       | x                    | x  | x   |
| II                   | A    |         | 109820               |     |                    | xx  | xx              |     |                  |                   |                     |                  |                    |                  |                       |                       |                        |     |                     | x                     |                      |    |     |
|                      |      |         | 338530               |     |                    |     |                 |     |                  |                   |                     |                  |                    |                  | x                     |                       |                        |     |                     | x                     |                      |    |     |
|                      |      |         | 207590               |     |                    |     |                 |     |                  |                   |                     |                  |                    |                  |                       |                       |                        |     |                     |                       |                      |    |     |
|                      |      |         |                      |     |                    |     |                 |     |                  |                   |                     |                  |                    |                  |                       |                       |                        |     |                     |                       |                      |    |     |
|                      | B    |         | 525430               |     |                    |     |                 | x   |                  |                   |                     |                  |                    |                  | x                     |                       | x                      |     |                     | x                     |                      |    |     |
|                      |      |         | 523980               |     |                    |     |                 |     |                  |                   |                     |                  |                    |                  | x                     |                       |                        |     |                     |                       |                      |    |     |
|                      |      |         | 519620               |     |                    |     |                 |     |                  |                   |                     |                  |                    |                  | x                     |                       |                        |     |                     |                       |                      |    |     |
|                      |      |         | 073810               |     |                    |     |                 |     |                  |                   |                     |                  |                    |                  | x                     |                       |                        |     |                     |                       |                      |    |     |
|                      |      |         | 289290               | ±   |                    |     |                 |     |                  |                   |                     |                  |                    |                  | x                     |                       |                        |     |                     |                       |                      |    |     |
|                      |      |         | 200200               |     |                    |     |                 |     |                  |                   |                     |                  |                    |                  | x                     |                       |                        |     |                     |                       |                      |    |     |
|                      |      |         | 024080               |     |                    |     |                 |     |                  |                   |                     |                  |                    |                  | x                     |                       |                        |     |                     |                       | x                    | x  | x   |
|                      |      |         | 345420               |     |                    |     |                 |     |                  |                   |                     |                  |                    |                  | x                     |                       |                        |     |                     |                       |                      |    |     |
|                      |      |         | 148390               |     |                    |     |                 |     |                  |                   |                     |                  |                    |                  | x                     | ±                     |                        |     |                     |                       |                      |    |     |
|                      |      |         | 148400               |     |                    |     |                 |     |                  |                   |                     |                  |                    |                  |                       |                       |                        |     |                     |                       | x                    |    | x   |
|                      |      |         | 043330               |     |                    |     |                 |     |                  |                   |                     |                  |                    |                  | x                     |                       |                        |     |                     |                       |                      |    |     |
|                      |      |         | 448410               |     |                    |     |                 |     |                  |                   |                     |                  |                    |                  | x                     |                       |                        |     |                     |                       |                      |    |     |
|                      | C    |         | 065740               |     |                    |     |                 |     |                  |                   |                     |                  |                    |                  |                       |                       |                        |     |                     |                       |                      |    |     |
|                      |      |         | 184510               |     |                    |     |                 |     |                  |                   |                     |                  |                    |                  |                       |                       |                        |     |                     |                       |                      |    |     |
|                      |      |         | 369500               |     |                    |     |                 |     |                  |                   |                     |                  |                    |                  |                       |                       |                        |     |                     |                       |                      |    |     |
|                      |      |         | 073800               |     |                    |     |                 |     |                  |                   |                     |                  |                    |                  |                       |                       |                        |     |                     |                       |                      |    |     |
|                      |      |         | 257730               |     |                    |     |                 |     |                  |                   |                     |                  |                    |                  |                       |                       |                        |     |                     |                       |                      |    |     |

Morph: Morphology; TE: Total Extract; IR: Iron-restriction; HI: High iron; Ca<sup>2+</sup>: Calcium; Suc: Sucrose; Hyd: Hydrogenosomes; TF: Trophozoite; CLS: Cyst-Like Structure; MEP: Membrane-Enriched Pellet; Am: Amoeboid; MVs Microvesicles; Exo: Exosome; Lys: Lysosome; X: Presence; XX: Overexpressed; ±: Down expression. Superindex numbers of references: <sup>15</sup>Dias-Lopes et al., 2018; <sup>18</sup>de Miguel et al., 2010; <sup>19</sup>Schneider et al., 2011; <sup>20</sup>Huang et al., 2012; <sup>21</sup>Beltrán et al., 2013; <sup>22</sup>Gould et al., 2013; <sup>24</sup>Twu et al., 2013; <sup>25</sup>Riestra et al., 2015; <sup>26</sup>Nievas et al. 2017; <sup>28</sup>Beri et al., 2020; <sup>29</sup>Molgora et al., 2021; <sup>30</sup>Zimmann et al., 2022.
