# Supplementary material for: Omics Analyses of Trichomonas vaginalis Actin and Tubulin and Their Participation in Intercellular Interactions and Cytokinesis
Source: MDPI journal article supplement (doi:10.3390/genes13061067), 2022-06-15
Supplement: s1 [file s1]

**Supplementary Table S2.** Analysis of DNA sequences encoding tubulin-like protein segments found in the *T. vaginalis* genome database.

| PROTEIN |      | TVAG_   | CONTIG | ORF      | aa       | pI   | MW   | TUBβ3 Homo sapiens (HuTUBβ) |             |              |          | TUBα1A Homo sapiens (HuTUBα) |             |              |          | ESTs |      |
|---------|------|---------|--------|----------|----------|------|------|-----------------------------|-------------|--------------|----------|------------------------------|-------------|--------------|----------|------|------|
|         |      |         |        |          |          |      |      | Identity                    |             | Structure    |          | Identity                     |             | Structure    |          |      |      |
| Group   | Name |         |        |          |          |      |      | Gene (%)                    | Protein (%) | Identity (%) | TM-score | Gene (%)                     | Protein (%) | Identity (%) | TM-score |      |      |
| I       | A    | TvTUBα1 | 359090 | DS113325 | 1359     | 452  | 4.90 | 50.11                       | 52.838      | 38.478       | 40       | 0.95                         | 75.423      | 87.389       | 89       | 0.96 | 187  |
|         |      | TvTUBα2 | 196270 | DS113615 | 1359     | 452  | 4.90 | 50.11                       | 52.768      | 38.478       | 40       | 0.95                         | 75.497      | 87.389       | 89       | 0.96 | 140  |
|         |      | TvTUBα3 | 206890 | DS113537 | 1359     | 452  | 4.90 | 50.11                       | 51.385      | 38.478       | 40       | 0.95                         | 75.865      | 87.389       | 89       | 0.96 | 191  |
|         |      | TvTUBα4 | 312330 | DS113391 | 1359     | 452  | 4.90 | 50.11                       | 52.698      | 38.478       | 40       | 0.95                         | 75.570      | 87.389       | 89       | 0.96 | 182  |
|         |      | TvTUBα5 | 360870 | DS113782 | 1359     | 452  | 4.90 | 50.11                       | 51.316      | 38.478       | 40       | 0.95                         | 75.644      | 87.389       | 89       | 0.96 | 122  |
|         |      | TvTUBα6 | 448390 | DS114717 | 1359     | 452  | 4.90 | 50.12                       | 50.548      | 38.478       | 40       | 0.95                         | 75.276      | 87.611       | 89       | 0.96 | 5    |
|         |      | TvTUBα7 | 467840 | DS113280 | 1359     | 452  | 4.90 | 50.12                       | 52.348      | 38.478       | 40       | 0.95                         | 75.791      | 87.611       | 89       | 0.96 | 41   |
|         | B    | TvTUBβ1 | 034440 | DS113428 | 1344     | 447  | 4.82 | 50.03                       | 66.375      | 75.831       | 78       | 0.97                         | 49.577      | 41.575       | 43       | 0.95 | 21   |
|         |      | TvTUBβ2 | 456920 | DS113186 | 1344     | 447  | 4.82 | 49.95                       | 68.062      | 76.053       | 78       | 0.97                         | 49.022      | 41.575       | 43       | 0.95 | 66   |
|         |      | TvTUBβ3 | 008680 | DS113653 | 1344     | 447  | 4.82 | 49.95                       | 68.209      | 76.053       | 78       | 0.97                         | 49.084      | 41.575       | 43       | 0.95 | 81   |
|         |      | TvTUBβ4 | 062880 | DS113216 | 1344     | 447  | 4.82 | 49.95                       | 67.988      | 76.053       | 78       | 0.97                         | 49.894      | 41.575       | 43       | 0.95 | 113  |
|         | II   | A       |        | 109820   | DS113339 | 1374 | 457  | 5.64                        | 50.67       | 38.466       | 29.536   | 32                           | 0.87        | 39.961       | 25.957   | 28   | 0.86 |
|         |      |         | 338530 | DS113922 | 1323     | 440  | 4.83 | 49.52                       | 57.594      | 67.184       | 71       | 0.99                         | 47.303      | 42.035       | 44       | 0.96 | 0    |
|         |      |         | 207590 | DS113587 | 1299     | 432  | 5.89 | 48.92                       | 38.406      | 22.601       | 25       | 0.94                         | 32.862      | 19.543       | 85       | 0.11 | 0    |
| B       |      |         | 525430 | DS133806 | 1197     | 398  | 5.74 | 44.64                       | 61.123      | 67.111       | 76       | 0.92                         | 44.610      | 37.251       | 43       | 0.88 | 25   |
|         |      |         | 523980 | DS139360 | 1104     | 367  | 5.35 | 40.91                       | 43.352      | 31.004       | 40       | 0.80                         | 61.504      | 71.397       | 88       | 0.82 | 77   |
|         |      |         | 519620 | DS141851 | 1077     | 358  | 5.56 | 39.60                       | 43.497      | 32.301       | 40       | 0.81                         | 60.398      | 70.732       | 89       | 0.80 | 66   |
|         |      |         | 073810 | DS113366 | 891      | 296  | 5.46 | 32.76                       | 46.721      | 47.807       | 79       | 0.64                         | 33.760      | 26.362       | 45       | 0.61 | 50   |
|         |      |         | 289290 | DS114116 | 765      | 254  | 4.98 | 28.84                       | 31.845      | 35.333       | 65       | 0.56                         | 27.094      | 22.838       | 41       | 0.55 | 0    |
|         |      |         | 200200 | DS114265 | 753      | 250  | 5.67 | 28.22                       | 37.132      | 33.333       | 61       | 0.51                         | 27.544      | 19.079       | 34       | 0.51 | 10   |
|         |      |         | 024080 | DS116663 | 639      | 212  | 5.19 | 23.84                       | 23.787      | 13.537       | 32       | 0.43                         | 33.855      | 33.186       | 73       | 0.45 | 20   |
|         |      |         | 345420 | DS113513 | 744      | 211  | 4.90 | 23.18                       | 25.712      | 20.796       | 44       | 0.48                         | 36.209      | 41.685       | 89       | 0.46 | 48   |
|         |      |         | 148390 | DS114446 | 768      | 198  | 4.65 | 21.66                       | 34.036      | 37.694       | 83       | 0.46                         | 27.088      | 20.796       | 46       | 0.43 | 15   |
|         |      |         | 148400 | DS114446 | 447      | 148  | 4.63 | 16.93                       | 21.045      | 21.111       | 66       | 0.30                         | 17.249      | 12.719       | 40       | 0.29 | 10   |
|         |      |         | 043330 | DS114339 | 387      | 128  | 5.26 | 14.39                       | 14.634      | 9.170        | 35       | 0.27                         | 21.313      | 22.395       | 79       | 0.29 | 0    |
|         |      |         | 448410 | DS114717 | 168      | 55   | 9.30 | 6.18                        | 6.657       | 4.667        | 36       | 0.12                         | 8.923       | 10.643       | 91       | 0.12 | 0    |
| C       |      |         | 065740 | DS113426 | 1305     | 434  | 5.63 | 48.45                       | 40.909      | 27.511       | 29       | 0.96                         | 41.219      | 25.546       | 28       | 0.94 | 3    |
|         |      |         | 184510 | DS184510 | 963      | 320  | 4.45 | 36.12                       | 31.202      | 30.131       | 44       | 0.67                         | 30.027      | 20.513       | 31       | 0.66 | 1    |
|         |      |         | 369500 | DS114576 | 882      | 293  | 4.94 | 32.12                       | 27.522      | 22.198       | 37       | 0.60                         | 30.490      | 18.495       | 33       | 0.58 | 0    |
|         |      |         | 073800 | DS113366 | 447      | 148  | 4.63 | 16.93                       | 20.778      | 21.111       | 66       | 0.30                         | 17.176      | 12.719       | 40       | 0.29 | 7    |
|         |      |         | 257730 | DS113609 | 147      | 48   | 9.66 | 5.48                        | 5.556       | 4.000        | 38       | 0.10                         | 7.743       | 8.869        | 85       | 0.11 | 1    |

There are 31 sequences encoding for tubulin-like protein segments in the *T. vaginalis* genome located in different contigs that were classified into two groups according to the identity with human tubulin alpha and beta. Group I represents the amino acid sequences with the highest identity to human tubulin α/β. Seven DNA sequences show high identity at the nucleotide and amino acid level with HuTUBα (Group I-A) and four with HuTUBβ (Group I-B) are considered bonafide tubulin proteins. Group II represents the rest of the sequences that could not be classified within group I. Three sequences showed similarity in size with tubulins of Group I, thus, we classified them into subgroup (II-A) and perhaps could represent another kind of tubulin because we did not analyze the identity with tubulin γ, δ, ε, and others. Twelve sequences were grouped into another subgroup (II –B) and included sequence products found in reported proteomes that could be gene fragments. The last group (II-C) represents hypothetical genes because their amino acid products were not found in reported proteomes. Most of them are expressed at the mRNA level, as confirmed by the presence of ESTs. **ORF**, Open Reading Frame; **bp**, Base Pairs; **aa**, Amino Acids; **pI**, Isoelectric Point; **MW**, Molecular Weight; **ESTs**, Expressed Sequence Tags; **TM-score**, template modeling score. It is a measure of topological similarity between the template and model structures (Xu and Zhang, 2010). The TM-score ranges between 0 and 1, where 1 indicates a perfect match and 0 is no match between the two structures. See Suppl. Table S10 for more information on the predicted 3D structure of each aa sequence.
