# Supplementary material for: Omics Analyses of Trichomonas vaginalis Actin and Tubulin and Their Participation in Intercellular Interactions and Cytokinesis
Source: MDPI journal article supplement (doi:10.3390/genes13061067), 2022-06-15
Supplement: s1 [file s1]

```

CNCD147  ATGGCTAAGAAGACGTTCTCAGACTCGTTATCGATAACGGCTCTGGTATGTGCAAGGCTGGCTTCTCTGGTGATGAAGCCCCACG 86
G3        ATGGCTGAAGAAGACGTTCTCAGACTCGTTATCGATAACGGCTCTGGTATGTGCAAGGCTGGCTTCTCTGGTGATGAAGCCCCACG 86
          *****
CNCD147  CTCTGTCTTCCCATCCGTTGTCTGGCCGTCCAAAGTACAAACAACAATTAGTTGGTGGCAACGCCAAGGATGTCTTCTGGTTGGTGATG 172
G3        CTCTGTCTTCCCATCCGTTGTCTGGCCGTCCAAAGTACAAACAACAATTAGTTGGTGGCAATGCCAAGGACGTCTTCTGGTTGGTGATG 172
          *****
CNCD147  AAGCTTGCTCCAAGGCTGGTGTCTCATCTCAAGTACCCAATTGAACACGGTATGTGCAACAACGGGATGATATGGAAAAGATC 258
G3        AAGCTTGCTCCAAGGCTGGTGTCTCATCTCAAGTACCCAATTGAACACGGTATCGTCAACAACGGGATGATATGGAAAAGATC 258
          ****
CNCD147  TGGCACCACACATTCTACAACGAACCTCGTGTGACCCAACAGAGACCCAGTTCTTCTTACAGAAGCCCCACTCAACCCAAAGGC 344
G3        TGGCACCACACATTCTACAACGAACCTCGTGTGACCCAACAGAGACCCAGTTCTTCTTACAGAAGCCCCACTCAACCCAAAGGC 344
          *****
CNCD147  TAACCGTGAGAAAATGATCTCCCTCATGTTGACACATTCAACGTCCCATCATTTATGTGCGCATCCAAGCCGTTCTTTCCCTCT 430
G3        TAACCGTGAGAAAATGATCTCCCTCATGTTGACACATTCAACGTCCCATCATTTATGTGCGCATCCAAGCCGTTCTTTCCCTCT 430
          *****
CNCD147  ACTCCTCTGGCCGTACAACAGGTATCGTTTTTCGATGCTGGTGATGGTGTTCACACAGTTCCAATTTACGAAGGCTACTCCCTT 516
G3        ACTCCTCTGGCCGTACAACAGGTATCGTTTTTCGATGCTGGTGATGGTGTTCACACAGTTCCAATTTACGAAGGCTACTCCCTT 516
          *****
CNCD147  CCACACGCCATCATGAGACTTAACCTCGCTGGCCGTGATCTCACAGCCTGGATGGTCAAGCTTCTCACAGAGCGTGGCAATGCTTT 602
G3        CCACACGCCATCATGAGACTTAACCTCGCTGGCCGTGATCTCACAGCCTGGATGGTCAAGCTTCTCACAGAGCGTGGCAATGCTTT 602
          *****
CNCD147  CAACACAACAGCCGAAAAGGAAATCGTTCGTGACATCAAGGAGAAGCTTTGCTATGTGCCCTCGACTTCGATGCTGAAATGGAGA 688
G3        CAACACAACAGCCGAAAAGGAAATCGTTCGTGACATCAAGGAGAAGCTTTGCTATGTGCCCTCGACTTCGATGCTGAAATGGAGA 688
          *****
CNCD147  AGGCCGCTACAGACTCCTCCATCAACGTCAACTACACACTTCCAGATGGCAACGTCATCACAATCGGCAATGAGCGCTTCCGCTGC 774
G3        AGGCCGCTACAGACTCCTCCATCAACGTCAACTACACACTTCCAGATGGCAACGTCATCACAATCGGCAATGAGCGCTTCCGCTGC 774
          *****
CNCD147  CCAGAAATGCTCTTCAAGCCATACTTCGATGGTATGGAATACGATGGTATCGACAAGACACTCTTCGACTCCATCATGAAGTGCGA 860
G3        CCAGAAATGCTCTTCAAGCCATACTTCGATGGTATGGAATACGATGGTATCGACAAGACACTCTTCGACTCCATCATGAAGTGCGA 860
          *****
CNCD147  TATCGATGTTTCGTAAGGATCTCTACGCTAACATCGTTCCTTTCTGGTGGCACAACAATGTTCAAGGCATCGCCGAACGTCCTTGACA 946
G3        TATCGATGTTTCGTAAGGATCTCTACGCTAACATCGTTCCTTTCTGGTGGCACAACAATGTTCAAGGCATCGCCGAACGTCCTTGACA 946
          *****
CNCD147  AGGAAATCACCGCTCTTGCTCCACCAACAATGAAGGTCAAGATCGTCGCCCCAGAAGAGCGTAAGTACGCCGTTTGGGTTCGGTGGC 1032
G3        AGGAAATCACAGCTCTTGCTCCACCAACAATGAAGGTCAAGATCGTCGCCCCAGAAGAGCGTAAGTACGCCGTTTGGGTTCGGTGGC 1032
          *****
CNCD147  TCCATCCTTGCTTCCCTCGCTACATTCCACAGATGGTTATCACCAAGGAGGAATACGACGAGGCTGGCCCATCCATCGTTCACCG 1118
G3        TCCATCCTTGCTTCCCTCGCTACATTCCACAGATGGTTATCACCAAGGAGGAATACGACGAGGCTGGCCCATCCATCGTTCACCG 1118
          *****
CNCD147  CAAGTGCTTCTAA 1131
G3        TAAGTGCTTCTAA 1131
          *****

```

**Supplementary Figure S3.** Nucleotide sequence alignment between the *tvact1* gene amplified from the *T. vaginalis* CNCD147 isolate and G3 from the *T. vaginalis* genome. The letters in red indicate the nt changes found after the amplicon DNA sequencing. \* Represents identical nucleotides.
