# Supplementary material for: Omics Analyses of Trichomonas vaginalis Actin and Tubulin and Their Participation in Intercellular Interactions and Cytokinesis
Source: MDPI journal article supplement (doi:10.3390/genes13061067), 2022-06-15
Supplement: s1 [file s1]

**Supplementary Table S1.** Analysis of DNA sequences encoding actin-like protein segments found in the *T. vaginalis* genome database.

| PROTEIN |         | TVAG_  | CONTIG   | ORF      | aa   | pI   | MW    | αACT Homo sapiens (HuACT) |             |              |          | ESTs |     |
|---------|---------|--------|----------|----------|------|------|-------|---------------------------|-------------|--------------|----------|------|-----|
|         |         |        |          |          |      |      |       | Identity                  |             | Structure    |          |      |     |
| Group   | Name    |        |          |          |      |      |       | Gene (%)                  | Protein (%) | Identity (%) | TM-score |      |     |
| I       | TvACT1  | 160060 | DS113250 | 1128     | 376  | 5.02 | 41.84 | 69.56                     | 74.27       | 75           | 0.97     | 168  |     |
|         | TvACT2  | 172680 | DS113193 | 1128     | 376  | 5.02 | 41.84 | 70.03                     | 74.27       | 75           | 0.97     | 503  |     |
|         | TvACT3  | 200190 | DS114265 | 1128     | 376  | 5.02 | 41.84 | 69.83                     | 74.27       | 74           | 0.96     | 322  |     |
|         | TvACT4  | 249200 | DS113187 | 1128     | 376  | 5.02 | 41.84 | 69.56                     | 74.27       | 75           | 0.97     | 404  |     |
|         | TvACT5  | 310030 | DS113416 | 1128     | 376  | 5.02 | 41.84 | 69.11                     | 74.27       | 75           | 0.97     | 239  |     |
|         | TvACT6  | 485210 | DS113547 | 1128     | 376  | 5.02 | 41.84 | 69.83                     | 74.27       | 75           | 0.97     | 73   |     |
|         | TvACT7  | 149090 | DS113750 | 1128     | 376  | 5.02 | 41.84 | 69.91                     | 74.27       | 75           | 0.97     | 141  |     |
|         | TvACT8  | 054030 | DS114248 | 1128     | 376  | 5.12 | 41.82 | 69.56                     | 74.01       | 74           | 0.97     | 338  |     |
|         | TvACT9  | 090470 | DS113682 | 1128     | 376  | 5.05 | 41.80 | 69.65                     | 74.27       | 75           | 0.97     | 231  |     |
|         | TvACT10 | 337240 | DS113974 | 1128     | 376  | 5.12 | 41.84 | 69.77                     | 74.27       | 75           | 0.97     | 181  |     |
| II      | A       |        | 512800   | DS139403 | 1098 | 366  | 5.24  | 40.72                     | 67.98       | 72.95        | 75       | 0.96 | 86  |
|         |         |        | 150270   | DS113237 | 1041 | 347  | 5.02  | 38.59                     | 63.77       | 63.61        | 74       | 0.91 | 140 |
|         |         |        | 534990   | DS116858 | 714  | 238  | 5.02  | 26.46                     | 44.71       | 48.01        | 75       | 0.42 | 75  |
|         | B       |        | 371880   | DS113281 | 1260 | 420  | 6.04  | 46.64                     | 41.58       | 31.60        | 36       | 0.83 | 46  |
|         |         |        | 043970   | DS113279 | 1227 | 409  | 6.19  | 46.40                     | 36.88       | 22.43        | 25       | 0.80 | 1   |
|         |         |        | 094140   | DS113185 | 1191 | 397  | 5.61  | 44.25                     | 53.81       | 39.95        | 41       | 0.91 | 0   |
|         |         |        | 189860   | DS113211 | 1116 | 372  | 4.62  | 41.43                     | 34.94       | 21.38        | 25       | 0.85 | 4   |
|         |         |        | 027630   | DS113305 | 1095 | 365  | 5.52  | 40.38                     | 51.40       | 45.50        | 48       | 0.94 | 0   |
|         |         |        | 161530   | DS113499 | 1080 | 360  | 5.12  | 39.00                     | 42.40       | 35.98        | 38       | 0.93 | 4   |
|         |         |        | 434970   | DS114152 | 918  | 306  | 6.05  | 33.75                     | 34.60       | 20.57        | 26       | 0.79 | 33  |
|         |         |        |          |          |      |      |       |                           |             |              |          |      |     |
|         | C       |        | 248040   | DS113963 | 1629 | 543  | 5.23  | 60.26                     | 31.48       | 26.64        | 37       | 0.82 | 0   |
|         |         |        | 071770   | DS113178 | 1230 | 410  | 5.81  | 46.21                     | 39.71       | 23.32        | 26       | 0.81 | 0   |
|         |         |        | 495500   | DS113254 | 1191 | 397  | 5.00  | 44.48                     | 37.57       | 20.62        | 22       | 0.83 | 2   |
|         |         |        | 247170   | DS113212 | 1137 | 379  | 5.44  | 41.98                     | 52.47       | 48.16        | 50       | 0.97 | 3   |
|         |         |        | 167330   | DS113191 | 1134 | 378  | 5.85  | 42.51                     | 43.61       | 30.75        | 33       | 0.96 | 1   |
|         |         |        | 276270   | DS113355 | 1113 | 371  | 5.21  | 41.62                     | 50.04       | 41.42        | 43       | 0.96 | 0   |
|         |         |        | 225210   | DS113224 | 1074 | 358  | 4.89  | 39.84                     | 43.37       | 33.95        | 35       | 0.94 | 3   |
|         |         |        | 354260   | DS113673 | 1056 | 352  | 5.50  | 39.14                     | 34.60       | 20.30        | 23       | 0.80 | 11  |
|         |         | 238100 | DS113188 | 369      | 123  | 4.86 | 14.37 | 18.84                     | 16.98       | 57           | 0.29     | 1    |     |

There are 29 DNA segments encoding for actin-like protein fragments in the *Tv* genome located in different contigs. Ten genes show high identity at the nucleotide and amino acid level with HuACT (Group I) and are considered bonafide actins. Three are gene fragments encoding protein fragments with high homology to Group I (Group II-A) and seven with divergence to Group I (Group II-B), both with evidence of expression in the different proteomes analyzed (Supplementary Table S3). Nine fragments also with divergence to Group I proteins without evidence of expression (Group II-C). Most of them are expressed at the mRNA level, as confirmed by the presence of ESTs. **ORF**, Open Reading Frame; **bp**, Base Pairs; **aa**, Amino Acids; **pI**, Isoelectric Point; **MW**, Molecular Weight; **ESTs**, Expressed Sequence Tags. **TM-score**, template modeling score. It is a measure of topological similarity between the template and 3D model structures (Xu and Zhang, 2010). The TM-score ranges between 0 and 1, where 1 indicates a perfect match and 0 is no match between the two structures. See Suppl. Table S9 for more information on the predicted 3D structure of each aa sequence.
