# Supplementary material for: Omics Analyses of Trichomonas vaginalis Actin and Tubulin and Their Participation in Intercellular Interactions and Cytokinesis
Source: MDPI journal article supplement (doi:10.3390/genes13061067), 2022-06-15
Supplement: s1 [file s1]

```

CNCD147  MAKEDVQTLVIDNGSGMCKAGFSGDEAPRSVFPSVVGRPKYKQQLVGGNAKDVFGDEAC  60
TvACT1    MAEDVQTLVIDNGSGMCKAGFSGDEAPRSVFPSVVGRPKYKQQLVGGNAKDVFGDEAC  60
          **  *****

CNCD147  SKAGVLILKYPIEHGIVNNWDDMEKIWHHTFYNELRVDPTTEHPVLLTEAPLNPKANREKM  120
TvACT1    SKAGVLILKYPIEHGIVNNWDDMEKIWHHTFYNELRVDPTTEHPVLLTEAPLNPKANREKM  120
          *****

CNCD147  ISLMFDTFNVPSFYVGIQAVLSLYSSGRTTGIVFDAGDGVSHTVPIYEGYSLPHAIMRLN  180
TvACT1    ISLMFDTFNVPSFYVGIQAVLSLYSSGRTTGIVFDAGDGVSHTVPIYEGYSLPHAIMRLN  180
          *****

CNCD147  LAGRDLTAWMVKLLTERGNAFNTTAEKEIVRDIKEKLCYVALDFDAEMEKAATDSSINVN  240
TvACT1    LAGRDLTAWMVKLLTERGNAFNTTAEKEIVRDIKEKLCYVALDFDAEMEKAATDSSINVN  240
          *****

CNCD147  YTLPDGNVITIGNERFRCPEMLFKPYFDGMEYDGIDKTLFDSIMKCDIDVRKDLYANIVL  300
TvACT1    YTLPDGNVITIGNERFRCPEMLFKPYFDGMEYDGIDKTLFDSIMKCDIDVRKDLYANIVL  300
          *****

CNCD147  SGGTTMFNGIAERLDKEITALAPPTMKVKIVAPEERKYAVWVGGSILASLATFPQMVITK  360
TvACT1    SGGTTMFQGIAERLDKEITALAPPTMKVKIVAPEERKYAVWVGGSILASLATFPQMVITK  360
          *****

CNCD147  EEYDEAGPSIVHRKCF  376
TvACT1    EEYDEAGPSIVHRKCF  376

```

**Supplementary Figure S5.** Amino acid alignment of the TvACT1 protein of the *T. vaginalis* CNCD147 isolate and the G3 *T. vaginalis* genome. The letters in red indicate the aa changes found after amplicon DNA sequencing. \* Represents identical amino acid.
