# Supplementary material for: Omics Analyses of Trichomonas vaginalis Actin and Tubulin and Their Participation in Intercellular Interactions and Cytokinesis
Source: MDPI journal article supplement (doi:10.3390/genes13061067), 2022-06-15
Supplement: s1 [file s1]

MREVISIHVGQAGVQIGNGCWELYCLEHGIQPDGQLPSDKTIGVEDDAFNTEFFSETGAGK  
HVPRAVFVDLEPTVVDEVRTGTYRQLFHPEQLISGKEDAANNYARGHYTVGKEIIDLTLD  
RIRKLADQCTGLQGFLIFHSFGGGTGAGFGSLLLERLSVDYGKKSLEFTVYPSPQVSTA  
IVEPYNSILATHSMIDHSDCAFMVDNEALYDLRRLDIERPTYTNLRNLIGQVVSSLTA  
SLRFDGALNVDFTEFQTNLVPYARIHFPICSYAPVISAEKAYHEQLSVAEITNSLFEPAN  
MMVKCDPRHGKVMACTLLYRGDVVPKDVSAAVATIKTKRTIQFVDWCPTGFKMGINYOPP  
TVVPGGDLAKVQRAVCMLANTTAIAEAWSRLDHKFDLMYAKRAVHVWYVGEEMEEAEFPE  
AREDLALLEKDYDEVAAESVEGGDEEEDGGEM

**Supplementary Figure S9.** Localization of peptides identified by LC-ESI-MS of the spot 2 and 3 of tubulin protein (TvTUB $\alpha$ 1; TVAG\_359090). The black box indicates the peptides identified in both spots.
