# Supplementary material for: Omics Analyses of Trichomonas vaginalis Actin and Tubulin and Their Participation in Intercellular Interactions and Cytokinesis
Source: MDPI journal article supplement (doi:10.3390/genes13061067), 2022-06-15
Supplement: s1 [file s1]

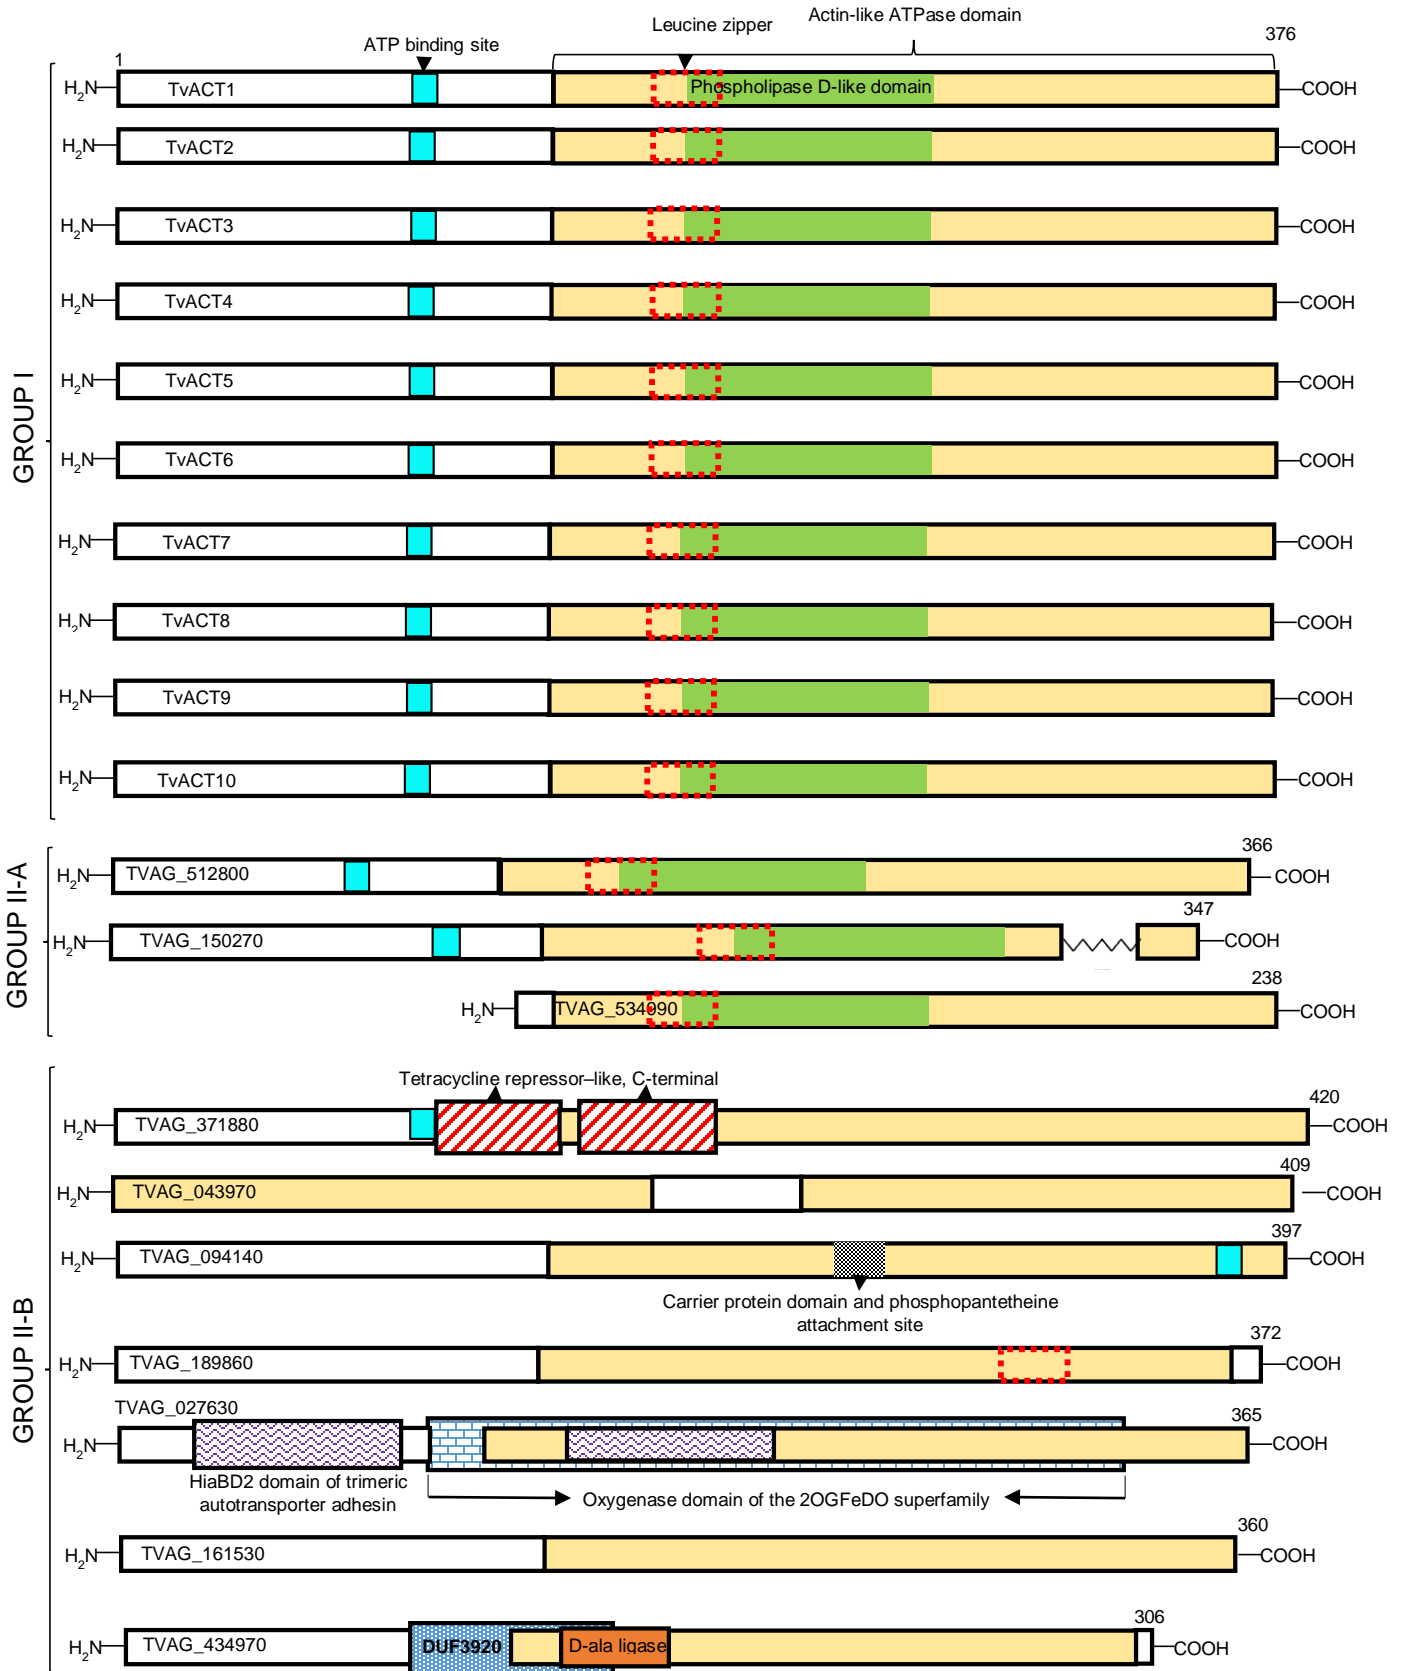

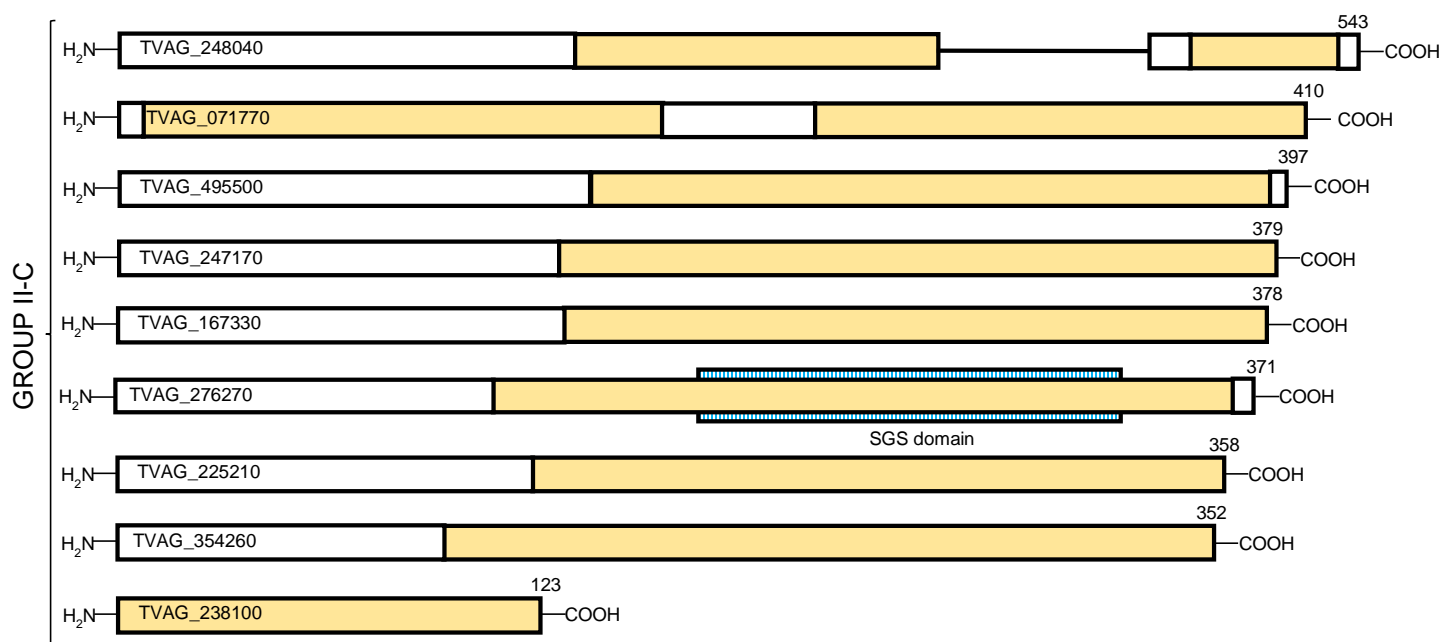

**Supplementary Figure S1.** *In silico* analysis of the 29 actin-like deduced aa sequences reported in the *T. vaginalis* genome database. Turquoise box: ATP-binding site. Cream box: actin-like ATPase domain. Green box: putative phospholipase D-type domain. Red dotted box: leucine zipper domain. Specific domains are indicated in certain actin-like protein fragments. Groups are based on Supplementary Table S1 description.
